# Supplementary material for: Profile of Children with Undernutrition Admitted in Two Secondary-Level Hospitals in Maputo City, Mozambique
Source: MDPI journal article supplement (doi:10.3390/nu16071056), 2024-04-04
Supplement: s1 [file s1]

**Table S1.** Nutritional assessment classification in children and adults [24,25].

| Outcomes                   | Anthropometric measures and cut points | Nutritional status |
|----------------------------|----------------------------------------|--------------------|
| <i>Children</i>            |                                        |                    |
| BMI-for-age                | BAZ < -2 SD                            | Thinness           |
|                            | BAZ < -3 SD                            | Severely thinness  |
| Wasting                    | WHZ < -2 SD                            | Wasted             |
|                            | WHZ < -3 SD                            | Severely wasted    |
| Stunting                   | HAZ < -2 SD                            | Stunted            |
|                            | HAZ < -3 SD                            | Severely stunted   |
| <i>Adults (caretakers)</i> |                                        |                    |
| BMI                        | BMI < 18.5                             | Underweight        |
|                            | 18.5 ≤ BMI < 24.9                      | Normal             |
|                            | 25 ≤ BMI < 29.9                        | Overweight         |
|                            | BMI ≥ 30                               | Obese              |
