# Supplementary material for: Profile of Children with Undernutrition Admitted in Two Secondary-Level Hospitals in Maputo City, Mozambique
Source: MDPI journal article supplement (doi:10.3390/nu16071056), 2024-04-04
Supplement: s1 [file s1]

**Table S2.** The wealth index asset items included for the socioeconomic status determination [6].

| Category                             | Variable                                                                           | Wealthier                                                                                      | Poorer                                |
|--------------------------------------|------------------------------------------------------------------------------------|------------------------------------------------------------------------------------------------|---------------------------------------|
| <b>Mobility</b>                      | Mobility (if has any of vehicle for example: bicycle, motorized, car)              | 1-yes                                                                                          | 0- no                                 |
| <b>Household characteristics</b>     | Electricity                                                                        | 1-yes                                                                                          | 0- no                                 |
|                                      | Freezer                                                                            | 1-yes                                                                                          | 0- no                                 |
|                                      | Cell phone                                                                         | 1-yes                                                                                          | 0- no                                 |
|                                      | Television                                                                         | 1-yes                                                                                          | 0- no                                 |
| <b>Money saving</b>                  | Bank account (also includes mobile money accounting for example mpesa, mkesh)      | 1-yes                                                                                          | 0 – no                                |
| <b>Household utilities and other</b> | Type of water supply                                                               | 1-pipped                                                                                       | 0-fountain or unprotected well        |
|                                      | Type of toilet                                                                     | 1-sink with and without flush                                                                  | 0-none, latrine, well                 |
|                                      | Type of flooring                                                                   | 1-cement, bricks                                                                               | 0-ground                              |
|                                      | Type of walls/house                                                                | 1-concrete blocks                                                                              | 0-zinc sheets, reed, other rudimentar |
|                                      | Type of roof                                                                       | 1-cement                                                                                       | 0-zinc sheets                         |
|                                      | Type of source for cooking                                                         | 1-electricity, gas and a combination with other sources (where electricity or gas is included) | 0-wood, coal                          |
|                                      | Sharing toilet (with other families)                                               | 1-no                                                                                           | 0-yes                                 |
|                                      | Location of the toilet                                                             | 1-inside                                                                                       | 0-outside of the house                |
|                                      | Land ownership and/or small piece of land for agriculture (includes in their home) | 1-yes                                                                                          | 0- no                                 |
